# Supplementary material
Source: MDPI journal article supplement (https://www.mdpi.com/2673-7140/3/3/41)
Supplement: s1 [file s1]

**Table S1.** Estimates of the effects of specific combining ability (SCA) and mean values of agronomic and root architecture traits of 15 popcorn hybrids under water-stress (WS) and well-watered (WW) conditions.

| Traits            | WS    |          | WW    |          | Hybrids | WS    |          | WW    |          | Traits                 |
|-------------------|-------|----------|-------|----------|---------|-------|----------|-------|----------|------------------------|
|                   | SCA   | Averages | SCA   | Averages |         | SCA   | Averages | SCA   | Averages |                        |
| Grain yield       | 0.88  | 2.06     | 1.11  | 2.80     | L61/L75 | 0.02  | 64.17    | -1.22 | 57.50    | Support root angle     |
|                   | 0.34  | 2.28     | 0.47  | 3.35     | L61/P2  | -0.16 | 60.83    | -1.58 | 55.00    |                        |
|                   | 0.43  | 2.08     | 0.39  | 3.03     | L61/P6  | -0.99 | 60.00    | 0.81  | 56.67    |                        |
|                   | 0.47  | 2.49     | 0.72  | 3.56     | L63/P2  | -3.69 | 53.33    | -2.04 | 50.00    |                        |
|                   | 0.53  | 2.25     | 0.65  | 3.25     | L63/P6  | -2.02 | 55.00    | -3.81 | 47.50    |                        |
|                   | 0.9   | 2.87     | 0.66  | 3.69     | L63/L76 | 0.39  | 60.00    | 0.71  | 58.33    |                        |
|                   | 0.36  | 1.83     | 0.48  | 3.23     | L65/P6  | -1.91 | 57.50    | -1.25 | 51.67    |                        |
|                   | 0.69  | 2.41     | 1.42  | 4.61     | L65/L76 | -2.01 | 60.00    | -4.94 | 61.67    |                        |
|                   | 0.44  | 1.91     | 0.84  | 3.88     | L65/P3  | -0.17 | 55.00    | -1.25 | 55.00    |                        |
|                   | 0.95  | 2.85     | 1.01  | 4.31     | L71/L76 | -1.26 | 60.83    | -1.12 | 55.00    |                        |
|                   | -0.04 | 1.61     | 0.66  | 3.80     | L71/P3  | -6.10 | 49.17    | -5.47 | 50.00    |                        |
|                   | 0.47  | 2.12     | 1.18  | 4.03     | L71/P7  | 0.30  | 60.00    | -3.68 | 56.67    |                        |
|                   | 0.04  | 1.41     | -0.13 | 2.23     | L75/P3  | -2.28 | 56.67    | -1.27 | 59.17    |                        |
|                   | 0.18  | 1.55     | 0.08  | 2.14     | L75/P7  | -0.05 | 63.33    | 3.25  | 56.67    |                        |
|                   | 0.07  | 2.2      | -0.03 | 3.21     | P2/P7   | -2.73 | 57.50    | 3.62  | 61.67    |                        |
| Popping expansion | 2.42  | 28.22    | 1.63  | 30.28    | L61/L75 | -0.04 | 73.33    | -2.11 | 66.67    | Cown root angle        |
|                   | -0.71 | 24.33    | -0.21 | 27.73    | L61/P2  | -0.99 | 70.00    | 1.96  | 68.33    |                        |
|                   | -2.65 | 23.94    | 1.64  | 32.00    | L61/P6  | 0.27  | 69.17    | 0.44  | 65.83    |                        |
|                   | 0.83  | 22.39    | -0.20 | 22.03    | L63/P2  | -1.55 | 66.67    | -0.43 | 61.67    |                        |
|                   | 2.00  | 25.11    | 0.02  | 24.67    | L63/P6  | -1.96 | 64.17    | -4.46 | 56.67    |                        |
|                   | -0.71 | 20.28    | 0.17  | 22.53    | L63/L76 | 0.01  | 70.00    | 1.42  | 69.17    |                        |
|                   | -0.26 | 22.22    | 4.60  | 28.93    | L65/P6  | -1.96 | 66.67    | -4.69 | 61.67    |                        |
|                   | -0.59 | 19.78    | -2.05 | 19.99    | L65/L76 | -4.99 | 67.50    | -1.32 | 71.67    |                        |
|                   | 1.47  | 21.00    | 1.60  | 23.93    | L65/P3  | -1.56 | 64.17    | -1.50 | 65.00    |                        |
|                   | 0.49  | 24.50    | -0.45 | 25.27    | L71/L76 | 0.12  | 71.67    | -5.62 | 64.17    |                        |
|                   | -1.11 | 22.06    | -2.35 | 23.67    | L71/P3  | -5.61 | 59.17    | -3.30 | 60.00    |                        |
|                   | -6.22 | 19.61    | -7.62 | 21.88    | L71/P7  | -0.14 | 68.33    | 0.28  | 66.67    |                        |
|                   | -0.19 | 19.00    | -1.53 | 20.14    | L75/P3  | 0.25  | 68.33    | 3.33  | 69.17    |                        |
|                   | 0.14  | 22.00    | -0.28 | 24.87    | L75/P7  | -0.95 | 70.83    | -3.08 | 65.83    |                        |
|                   | 0.46  | 21.56    | 0.08  | 24.53    | P2/P7   | -1.06 | 68.33    | -3.01 | 63.50    |                        |
| Popcorn volume    | 27.51 | 59.04    | 33.65 | 84.77    | L61/L75 | 0.13  | 7.83     | -0.59 | 7.17     | Number of support root |
|                   | 10.09 | 55.97    | 16.29 | 93.19    | L61/P2  | -0.24 | 7.67     | -0.13 | 8.17     |                        |
|                   | 6.03  | 48.06    | 18.56 | 96.90    | L61/P6  | 1.26  | 9.00     | 0.57  | 9.00     |                        |
|                   | 11.81 | 55.54    | 15.25 | 78.69    | L63/P2  | -0.19 | 8.00     | 0.05  | 8.17     |                        |
|                   | 17.08 | 56.96    | 14.47 | 79.35    | L63/P6  | -0.52 | 7.50     | 0.08  | 8.33     |                        |
|                   | 16.03 | 58.24    | 16.03 | 83.41    | L63/L76 | -0.66 | 7.33     | 0.00  | 8.00     |                        |
|                   | 7.67  | 40.85    | 24.44 | 93.55    | L65/P6  | 0.40  | 7.50     | -0.43 | 7.83     |                        |
|                   | 11.82 | 47.35    | 22.21 | 93.81    | L65/L76 | -1.40 | 5.67     | 1.32  | 9.33     |                        |
|                   | 12.17 | 40.46    | 23.93 | 93.38    | L65/P3  | -0.43 | 6.83     | -0.08 | 7.33     |                        |
|                   | 26.12 | 69.34    | 30.15 | 108.60   | L71/L76 | -0.23 | 6.83     | 0.57  | 8.17     |                        |
|                   | -0.51 | 35.47    | 13.52 | 89.80    | L71/P3  | -1.25 | 6.00     | -0.16 | 6.83     |                        |
|                   | 1.99  | 41.93    | 11.04 | 88.28    | L71/P7  | 0.03  | 6.83     | 0.41  | 8.33     |                        |
|                   | -0.43 | 27.11    | -7.86 | 44.55    | L75/P3  | 1.13  | 8.33     | 0.08  | 7.17     |                        |
|                   | 3.17  | 34.67    | -1.09 | 52.27    | L75/P7  | -1.25 | 5.50     | -0.34 | 7.67     |                        |
|                   | 1.99  | 47.82    | 0.05  | 79.19    | P2/P7   | -0.11 | 6.83     | 0.45  | 9.00     |                        |

|                   |       |       |       |       |         |       |       |       |       |                          |
|-------------------|-------|-------|-------|-------|---------|-------|-------|-------|-------|--------------------------|
| 100- Grain weight | 1.32  | 14.44 | 1.47  | 15.58 | L61/L75 | -0.12 | 13.67 | -0.53 | 13.17 | Number of crown root     |
|                   | 0.49  | 14.51 | 0.31  | 15.48 | L61/P2  | 1.54  | 16.33 | -0.79 | 15.17 |                          |
|                   | 1.06  | 13.49 | 0.20  | 13.78 | L61/P6  | 1.22  | 15.50 | 1.67  | 18.00 |                          |
|                   | 0.01  | 14.44 | 0.56  | 16.06 | L63/P2  | -0.33 | 14.00 | -0.92 | 14.50 |                          |
|                   | -0.73 | 12.11 | 1.82  | 15.73 | L63/P6  | 0.35  | 14.17 | 0.54  | 16.33 |                          |
|                   | 1.31  | 15.31 | 0.57  | 15.58 | L63/L76 | -0.54 | 14.83 | 0.89  | 17.17 |                          |
|                   | 1.1   | 14.92 | 0.23  | 14.82 | L65/P6  | -1.43 | 12.83 | -0.91 | 15.67 |                          |
|                   | 0.95  | 15.94 | 1.82  | 17.51 | L65/L76 | -0.31 | 15.50 | 2.94  | 20.00 |                          |
|                   | 1.61  | 16.84 | 1.10  | 17.75 | L65/P3  | 0.63  | 14.83 | 0.95  | 16.33 |                          |
|                   | -0.13 | 15.02 | 0.52  | 16.51 | L71/L76 | -0.46 | 14.50 | -0.94 | 15.33 |                          |
|                   | -0.92 | 14.47 | 0.70  | 17.64 | L71/P3  | 0.48  | 13.83 | -0.26 | 14.33 |                          |
|                   | 0.94  | 14.93 | 1.33  | 17.57 | L71/P7  | -0.98 | 14.50 | 2.03  | 16.67 |                          |
|                   | -1.21 | 13.1  | -0.18 | 15.28 | L75/P3  | -1.24 | 10.17 | 1.17  | 14.17 |                          |
|                   | 0.59  | 13.5  | 1.29  | 16.04 | L75/P7  | -1.19 | 9.83  | -1.20 | 11.83 |                          |
|                   | 0.12  | 13.93 | 1.01  | 16.83 | P2/P7   | -1.69 | 10.33 | 1.54  | 16.83 |                          |
| Ear width         | 2.58  | 29.19 | 3.83  | 32.86 | L61/L75 | -0.10 | 5.67  | 0.34  | 6.17  | Density of support roots |
|                   | 1.82  | 31.37 | 2.17  | 34.81 | L61/P2  | 0.46  | 5.33  | 0.08  | 5.50  |                          |
|                   | 2.06  | 29.90 | 1.26  | 31.89 | L61/P6  | 0.18  | 4.67  | 0.23  | 6.00  |                          |
|                   | -0.02 | 30.03 | 0.81  | 33.82 | L63/P2  | 0.53  | 5.50  | -0.07 | 5.33  |                          |
|                   | 1.23  | 29.57 | 2.50  | 33.49 | L63/P6  | 0.25  | 4.83  | 0.08  | 5.83  |                          |
|                   | 0.06  | 29.51 | 2.00  | 34.30 | L63/L76 | 0.11  | 5.17  | 0.90  | 6.33  |                          |
|                   | 2.79  | 29.28 | 2.04  | 31.81 | L65/P6  | 0.00  | 3.33  | 0.78  | 5.50  |                          |
|                   | 3.93  | 31.53 | 3.20  | 34.28 | L65/L76 | 0.86  | 4.67  | 0.93  | 5.33  |                          |
|                   | 1.60  | 28.41 | 1.78  | 32.30 | L65/P3  | 0.68  | 4.67  | 0.08  | 4.67  |                          |
|                   | 2.56  | 31.26 | 0.76  | 33.76 | L71/L76 | 0.35  | 5.17  | 0.66  | 6.00  |                          |
|                   | 1.10  | 29.02 | 2.28  | 34.71 | L71/P3  | -0.16 | 4.83  | -0.03 | 5.50  |                          |
|                   | 2.89  | 30.85 | 2.27  | 34.04 | L71/P7  | 0.40  | 5.00  | 0.25  | 5.50  |                          |
|                   | 1.04  | 27.60 | 1.44  | 30.95 | L75/P3  | -0.14 | 5.67  | 0.19  | 6.33  |                          |
|                   | 0.99  | 27.60 | 1.44  | 30.28 | L75/P7  | 0.75  | 6.17  | 0.14  | 6.00  |                          |
|                   | -0.34 | 29.21 | 1.32  | 33.76 | P2/P7   | -0.36 | 4.17  | 0.05  | 5.50  |                          |
| Ear length        | 3.13  | 12.64 | 3.24  | 13.89 | L61/L75 | -0.10 | 4.00  | -0.31 | 4.17  | Density of crown root    |
|                   | -0.04 | 10.02 | 0.26  | 11.88 | L61/P2  | -0.09 | 3.33  | 0.33  | 4.50  |                          |
|                   | -0.93 | 9.09  | 0.01  | 11.50 | L61/P6  | 0.24  | 3.50  | 0.66  | 5.17  |                          |
|                   | 0.62  | 11.07 | 1.38  | 13.63 | L63/P2  | -0.23 | 3.17  | -0.06 | 4.00  |                          |
|                   | 1.21  | 11.63 | 1.21  | 13.33 | L63/P6  | -0.06 | 3.17  | -0.39 | 4.00  |                          |
|                   | 0.10  | 10.74 | 1.10  | 13.63 | L63/L76 | 0.23  | 4.00  | 0.35  | 4.50  |                          |
|                   | 0.93  | 11.68 | 1.40  | 13.58 | L65/P6  | 0.15  | 2.67  | 0.74  | 4.33  |                          |
|                   | 1.57  | 12.54 | 1.96  | 14.55 | L65/L76 | 0.53  | 3.58  | 1.32  | 4.67  |                          |
|                   | 1.27  | 12.88 | 0.43  | 13.25 | L65/P3  | 0.42  | 3.50  | 0.33  | 3.50  |                          |
|                   | 1.10  | 11.65 | -0.07 | 12.08 | L71/L76 | 0.03  | 3.67  | 0.35  | 4.67  |                          |
|                   | 1.33  | 12.51 | 1.56  | 13.95 | L71/P3  | 0.01  | 3.67  | -0.47 | 3.67  |                          |
|                   | 1.40  | 12.09 | 1.21  | 13.75 | L71/P7  | 0.05  | 3.50  | 0.04  | 4.00  |                          |
|                   | -1.30 | 9.83  | 0.92  | 13.07 | L75/P3  | -0.22 | 4.00  | 0.44  | 4.83  |                          |
|                   | 0.95  | 11.59 | -0.01 | 12.29 | L75/P7  | -0.34 | 3.67  | 0.46  | 4.67  |                          |
|                   | 0.10  | 11.29 | -0.30 | 12.97 | P2/P7   | -0.34 | 3.00  | -0.90 | 3.00  |                          |
